# Supplementary material for: Optimization and characterization of a lactate-oxidase electrode
Source: Royal Society of Chemistry journal article supplement (doi:10.1039/d5ra07173a), 2025-01-01
Supplement: d5ra07173a1.pdf [file d5ra07173a1.pdf]

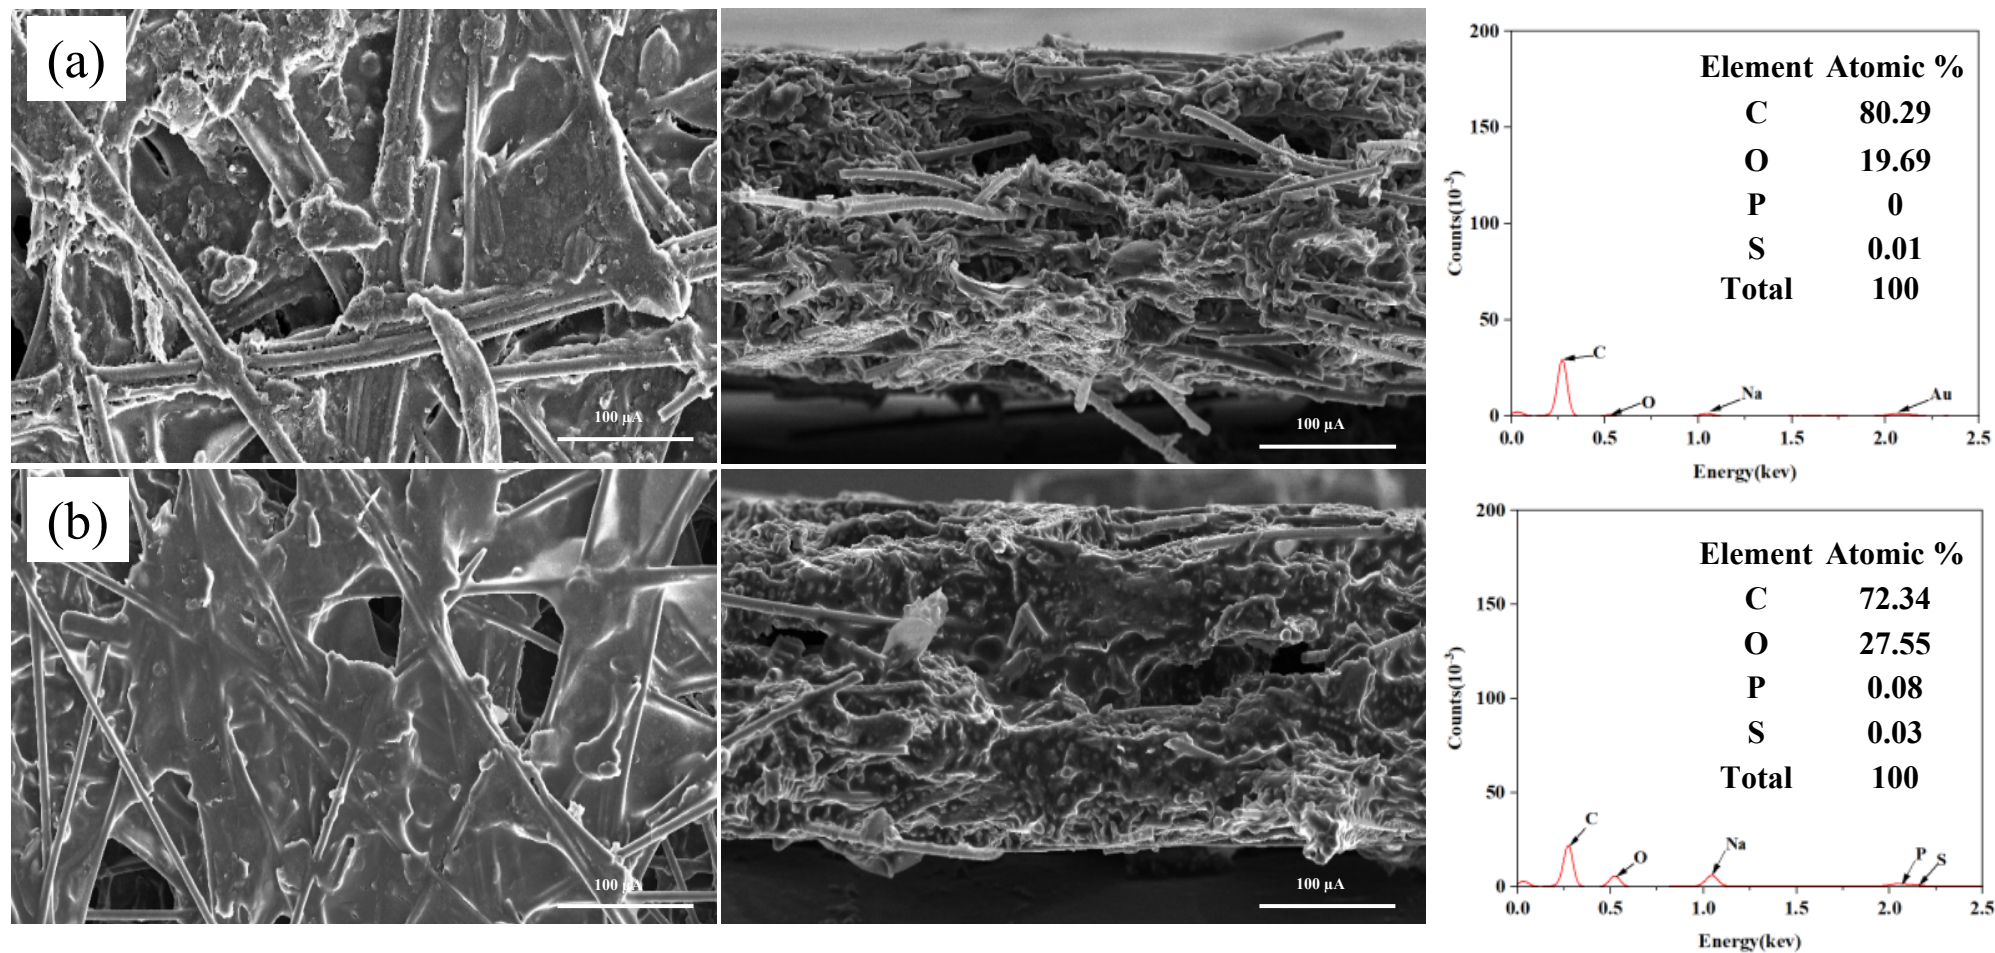

**Fig. S1** FE-SEM images and EDS mappings of the tops and cross sections of (a) CP with one layer of LOx-PEGDGE, and (b) CP with four layers of LOx-PEGDGE (optimized electrode) after five repeated cycles.
